# Supplementary material for: OGG1 Inhibition Reduces Acinar Cell Injury in a Mouse Model of Acute Pancreatitis
Source: MDPI journal article supplement (doi:10.3390/biomedicines10102543), 2022-10-12
Supplement: s1 [file s1]

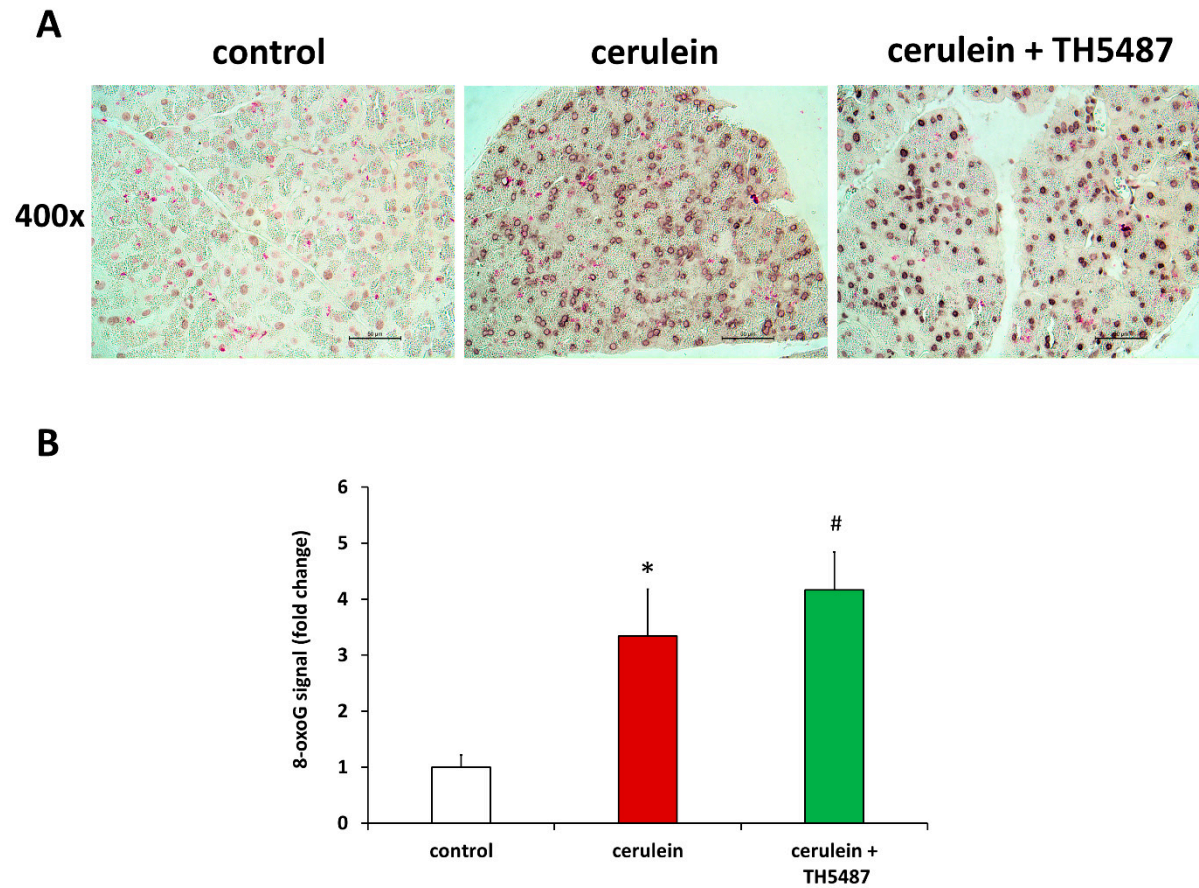

**Supplementary Figure S1. (A)** Representative images of 8-oxoG staining in pancreas sections **(B)** TH5487 results in accumulation of genomic 8-oxoG lesions in the pancreas. OGG1 inhibition increased 8-oxoG level. Magnification was 400x. Scale bars are 50  $\mu$ m. Values are presented as mean  $\pm$  SD, n=6. \*p<0.05 vs. control group, #p<0.05 vs. cerulein group

**A**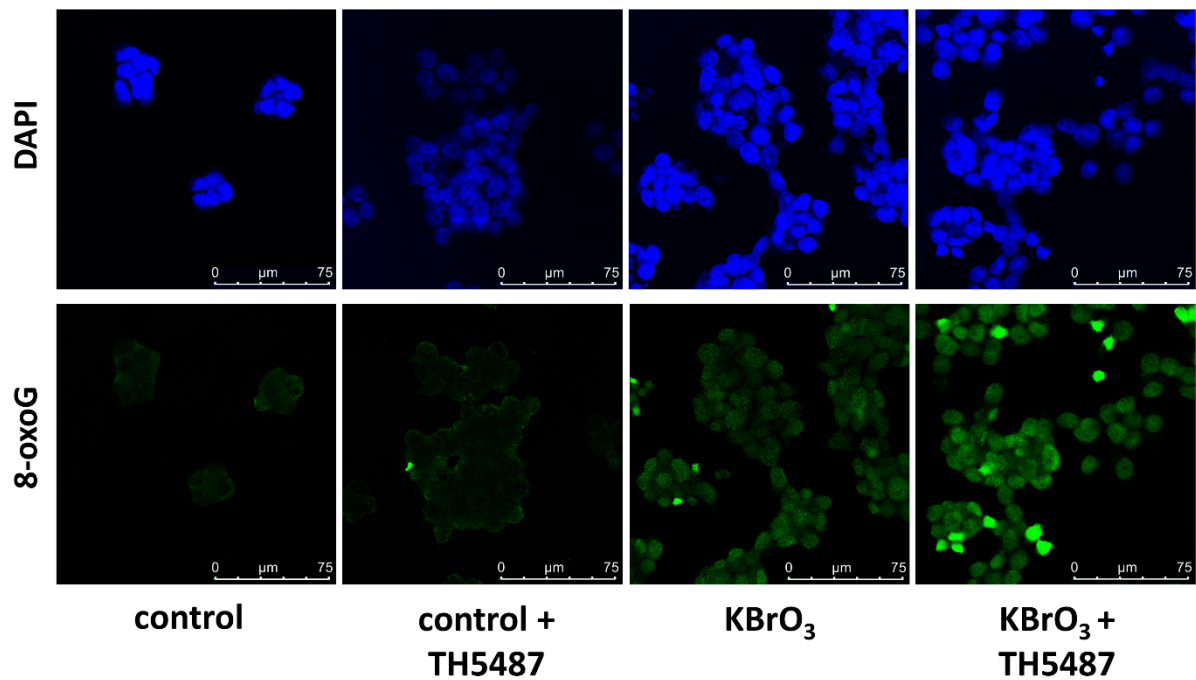**B**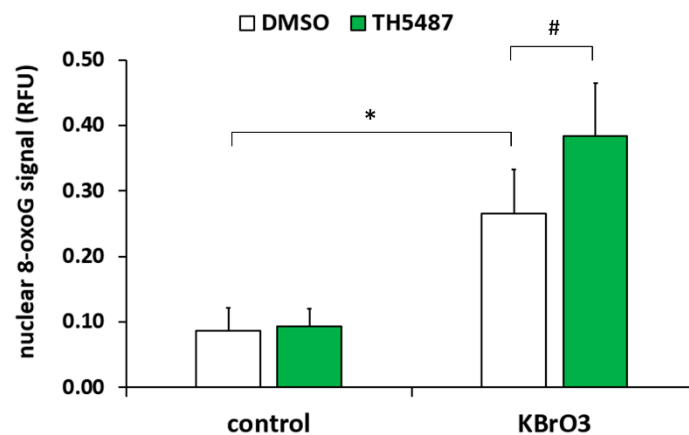

**Supplementary Figure S2. (A)** Immunofluorescent staining of 8-oxoG in AR42J cell line. Representative images of three experiments are shown. **(B)** The level of genomic 8-oxoG was significantly higher in potassium bromate-treated cells compared to the control. TH5487 treatment caused increased 8-oxoG formation in KBrO<sub>3</sub>-treated cells indicating that TH5487 prevents 8-oxoG repair by OGG1. Data are presented as mean  $\pm$  SD, \* $P < 0.05$ , # $P < 0.05$ . Scale bars are 75  $\mu$ m.

**A**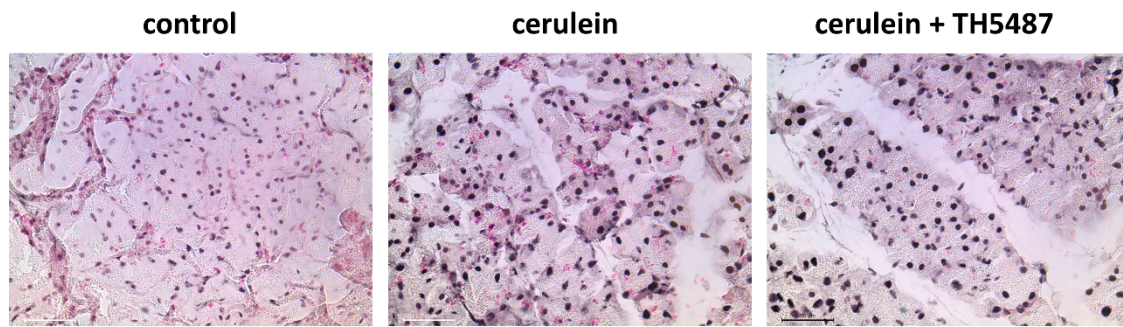**B**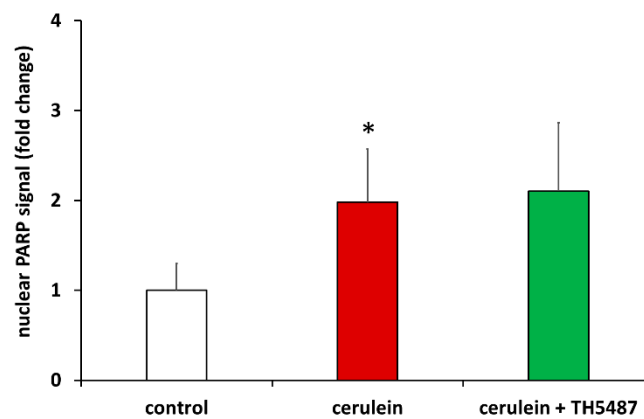

**Supplementary Figure S3. (A)** Immunohistochemical staining of PARP in AP model. **(B)** The PARP amount increased by two fold in cerulein and cerulein + TH5487 treated group. Values are represented as mean  $\pm$  SD, n = 6. \*P < 0.05 vs. control group.
